# Supplementary material for: Directly Observed Physical Activity of Year 1 Children during School Class Time: A Cross-Sectional Study
Source: MDPI journal article supplement (doi:10.3390/ijerph18073676), 2021-04-01
Supplement: s1 [file s1]

Table S1: Frequencies of observed intervals (and percentage of intervals) of physical activity opportunities provided during Year 1 school class time by physical activity intensity levels 1-5

| Observation categories       | Observation codes                             | Observed intervals (% total) | Observed intervals (%) by physical activity intensity level |                 |                          |                 |                    |                |                     |
|------------------------------|-----------------------------------------------|------------------------------|-------------------------------------------------------------|-----------------|--------------------------|-----------------|--------------------|----------------|---------------------|
|                              |                                               |                              | Stationary (level 1)                                        | Limbs (level 2) | Sedentary (levels 1 & 2) | Light (level 3) | Moderate (level 4) | Fast (level 5) | MVPA (levels 4 & 5) |
| <b>Instructional setting</b> | Change class*                                 | 298 (5.6)                    | 166 (55.7)                                                  | 52 (17.4)       | 218 (73.2)               | 65 (21.8)       | 3 (1)              | 12 (4)         | 15 (5.0)            |
|                              | Physical Education                            | 233 (4.4)                    | 93 (39.9)                                                   | 52 (22.3)       | 145 (62.2)               | 39 (16.7)       | 0 (0)              | 49 (21)        | 49 (21)             |
| <b>Activity context</b>      | Classroom PA*                                 | 151 (2.8)                    | 53 (35.1)                                                   | 69 (45.7)       | 121 (80.1)               | 17 (11.3)       | 3 (2)              | 9 (10.2)       | 13 (8.6)            |
|                              | Classroom PA Teacher-led (non-academic)*      | 50 (0.2)                     | 21 (42.0)                                                   | 20 (40)         | 41 (82)                  | 2 (4)           | 1 (2.5)            | 6 (12)         | 7 (14)              |
|                              | Classroom PA Teacher-led (academic)*          | 10 (0.2)                     | 3 (30.0)                                                    | 7 (70)          | 10 (100)                 | 0 (0)           | 0 (0)              | 0 (0)          | 0 (0)               |
|                              | Classroom PA – Technology-led (non-academic)* | 77 (1.5)                     | 28 (36.4)                                                   | 33 (42.9)       | 60 (77.9)                | 11 (14.3)       | 2 (2.6)            | 3 (3.9)        | 6 (7.8)             |
|                              | Classroom PA – Technology-led (academic)*     | 14 (0.3)                     | 1 (7.1)                                                     | 9 (64.3)        | 10 (71.4)                | 4 (28.6)        | 0 (0)              | 0 (0)          | 0 (0)               |
|                              | PE + sport                                    | 313 (5.9)                    | 128 (40.9)                                                  | 64 (20.4)       | 192 (61.3)               | 56 (17.9)       | 2 (0.6)            | 63 (20.1)      | 65 (20.8)           |
|                              | Whole class*                                  | 2482 (46.8)                  | 1676 (67.5)                                                 | 478 (19.3)      | 2153 (86.7)              | 241 (9.7)       | 6 (0.2)            | 81 (3.3)       | 88 (3.5)            |
| <b>Group composition</b>     | Group*                                        | 2823 (53.2)                  | 1559 (55.2)                                                 | 858 (30.4)      | 2417 (85.6)              | 398 (14.1)      | 1 (0.0)            | 7 (0.2)        | 8 (0.3)             |

Classroom PA: classroom-based physical activity; PA: physical activity; PE: physical education;

Values may not add up to exactly 100% due to rounding.

Sedentary (stationary or limbs) = Level 1 code (stationary or motionless with no major limb movement or major joint movements) and Level 2 code (stationary with easy movement of limbs or trunk without translocation; Light PA = Level 3 code (translocation at a slow and easy pace); Moderate to vigorous PA = Level 4 code (translocation at a moderate pace) and Level 5 code (translocation at a fast or very fast pace) (See McIver et al (2016) for detailed description of activity level codes)

\*See Table A1 for definitions of modified OSRAC-E codes
